RESEARCH ARTICLE

# Pre-Transplant Depression Is Associated with Length of Hospitalization, Discharge Disposition, and Survival after Liver Transplantation

Shari S. Rogal<sup>1,2,3\*</sup>, Gautham Mankaney<sup>4</sup>, Viyan Udawatta<sup>4</sup>, Matthew Chinman<sup>1,5</sup>, Chester B. Good<sup>1,4</sup>, Susan Zickmund<sup>1,4</sup>, Klaus Bielefeldt<sup>3</sup>, Alexis Chidi<sup>1,4</sup>, Naudia Jonassaint<sup>3</sup>, Alison Jazwinski<sup>3</sup>, Obaid Shaikh<sup>2,3</sup>, Christopher Hughes<sup>2</sup>, Paulo Fontes<sup>2</sup>, Abhinav Humar<sup>2</sup>, Andrea DiMartini<sup>6</sup>

**1** Center for Health Equity Research and Promotion, VA Pittsburgh Healthcare System, Pittsburgh, PA, United States of America, **2** Department of Surgery, University of Pittsburgh, Pittsburgh, PA, United States of America, **3** Division of Gastroenterology, Hepatology, and Nutrition, University of Pittsburgh, Pittsburgh, PA, United States of America, **4** Division of General Internal Medicine, University of Pittsburgh, Pittsburgh, PA, United States of America, **5** Rand Corporation, Pittsburgh, PA, United States of America, **6** Department of Psychiatry, University of Pittsburgh, Pittsburgh, PA, United States of America

\* [rogalss@upmc.edu](mailto:rogalss@upmc.edu)

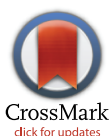

OPEN ACCESS

**Citation:** Rogal SS, Mankaney G, Udawatta V, Chinman M, Good CB, Zickmund S, et al. (2016) Pre-Transplant Depression Is Associated with Length of Hospitalization, Discharge Disposition, and Survival after Liver Transplantation. PLoS ONE 11(11): e0165517. doi:10.1371/journal.pone.0165517

**Editor:** Stanislaw Stepkowski, University of Toledo, UNITED STATES

**Received:** June 17, 2016

**Accepted:** October 13, 2016

**Published:** November 7, 2016

**Copyright:** This is an open access article, free of all copyright, and may be freely reproduced, distributed, transmitted, modified, built upon, or otherwise used by anyone for any lawful purpose. The work is made available under the [Creative Commons CC0](https://creativecommons.org/licenses/by/4.0/) public domain dedication.

**Data Availability Statement:** The University of Pittsburgh IRB does not allow online data sharing due to concerns about the protection of the privacy of the subjects. There was a waiver of informed consent applied to the study. Therefore, investigators who wish to access the data need to have IRB approval and we will put in for local IRB approval to share the data. They can contact Dr. Shari Rogal at [rogalss@upmc.edu](mailto:rogalss@upmc.edu) in order to inquire about accessing a limited dataset pending regulatory approval.

## Abstract

Depression after liver transplantation has been associated with decreased survival, but the effects of pre-transplant depression on early and late post-transplant outcomes remain incompletely evaluated. We assessed all patients who had undergone single-organ liver transplantation at a single center over the prior 10 years. A diagnosis of pre-transplant depression, covariates, and the outcomes of interest were extracted from the electronic medical record. Potential covariates included demographics, etiology and severity of liver disease, comorbidities, donor age, graft type, immunosuppression, and ischemic times. In multivariable models adjusting for these factors, we evaluated the effect of pre-transplant depression on transplant length of stay (LOS), discharge disposition (home vs. facility) and long-term survival. Among 1115 transplant recipients with a median follow-up time of 5 years, the average age was 56±11 and MELD was 12±9. Nineteen percent of the study population had a history of pre-transplant depression. Pre-transplant depression was associated with longer LOS (median = 19 vs. 14 days, IRR = 1.25, CI = 1.13, 1.39), discharge to a facility (36% vs. 25%, OR 1.70, CI = 1.18, 2.45), and decreased survival (HR = 1.54, CI = 1.14, 2.08) in this cohort, accounting for other potential confounders. In conclusion, pre-transplant depression was significantly associated with longer transplant length of stay, discharge to a facility, and mortality in this cohort.

**Funding:** The authors received no specific funding for this work. MC is employed by Rand Corporation. Rand Corporation provided support in the form of salaries for author MC, but did not have any additional role in the study design, data collection and analysis, decision to publish, or preparation of the manuscript. The specific role of this author is articulated in the “author contributions” section.

**Competing Interests:** We have the following interests: MC is employed by Rand Corporation. SR and NJ receive grant funding to the institution from Gilead Sciences unrelated to the presented work. NJ has also received compensation for serving on the advisory board of Gilead Sciences. SZ receives salary support from Gilead Sciences that is unrelated to this study. AH has received an honorarium for an unrelated talk from Shire Pharmaceutical. OS receives grant support from Gilead Sciences, Merit Medical Systems, Shinongi Pharmaceuticals, and Mallinckrodt Pharmaceuticals which is unrelated to the present study. There are no patents, products in development or marketed products to declare. This does not alter our adherence to all the PLOS ONE policies on sharing data and materials.

## Introduction

With advances in immunosuppression, standardization of surgical technique, and improved recipient selection, liver transplantation is the standard of care for advanced cirrhosis. However, long-term survival after liver transplant remains suboptimal, with only 60% of recipients surviving to 10 years [1]. Thus the identification of modifiable risk factors associated with poorer survival has been a key goal of liver transplant outcomes research. Depression is potentially one of these modifiable risk factors and is common among patient with cirrhosis with rates over twice population norms (5). Depression has been convincingly linked with poorer survival in other medical disorders (e.g. heart failure, acute myocardial infarction and stroke) [2–4]. Depression detracts from quality of life [5] and is associated with disability among patients with chronic liver disease [6], but remains undertreated both in the pre- and post-transplant settings [7, 8]. Therefore, it is critical to understand the associations between depression and outcomes after liver transplantation.

There has been limited investigation into the relationship between depression and outcomes among patients undergoing liver transplantation. Prior studies suggest that depression negatively impacts some transplant outcomes. Pre-transplant depression has been associated with decreased quality of life and decreased self-reported recovery after liver transplant [7, 9]. We found *post*-transplant trajectories of depressive symptoms in the year following transplant were associated with increased long-term all-cause mortality, particularly among recipients on inadequate or no antidepressant medications in the first post-transplant year [10]. However, using post-transplant depression as a predictor of outcomes does not allow examination of the critical events occurring in the immediate perioperative period such as length of hospital stay or disposition. Few studies of depression in the setting of transplant have assessed associations beyond survival and quality of life. We found, in a small cohort, that recipients with any history of pre-transplant depression, who were untreated at the time of transplant, had increased acute rejection after transplantation [11]. Larger studies supporting the relationship between pre-transplant depression and post-transplant outcomes, particularly early after transplant, are still lacking. Identifying potential pre-transplant predictors of poor outcomes after transplantation may enable clinicians to target individuals at risk with appropriate interventions and improve transplant outcomes. Thus, we conducted a large, single-institution retrospective analysis to understand 1) the role of pre-transplant depression in immediate post-transplant outcomes and long-term survival and 2) how antidepressant medication use at the time of transplant impact these outcomes. In particular, evaluating pre-transplant depression allowed us to examine not only long-term mortality but also proximal events such as length of stay and discharge disposition.

## Materials and Methods

This study was approved by the University of Pittsburgh IRB PRO13070515 with a waiver of informed consent due to the retrospective nature of the study. We reviewed the electronic medical records of all patients who underwent first-time liver transplantation at the University of Pittsburgh from 2004–2014 (n = 1255). Recipients were excluded if they had undergone combined organ transplant (n = 103) or had fulminant hepatic failure (n = 37). Data extracted included demographics, etiology of liver disease, hepatocellular carcinoma (HCC) status at initial transplantation, donor age (living or deceased), donor type (donation after brain death, donation after cardiac death, or living donor), cold and warm ischemia times, type of immunosuppression on transplant discharge, and model for end-stage liver disease (MELD) at transplantation. HCC was confirmed by explant pathology or history of documented HCC treatment. The etiology of liver disease was divided into hepatitis C (HCV) with or without

alcohol, alcohol alone, non-alcoholic steatohepatitis (NASH), autoimmune, and other. Recipients with cryptogenic cirrhosis in the chart who were likely to have NASH based on physician notes were classified as NASH. Based on medical diagnosis codes, we collected information regarding pre-transplant co-morbid illnesses and calculated each individual's Charlson Comorbidity Index, a commonly used index of medical comorbidity developed based on one-year mortality data [12]. Outcomes collected included length of transplant admission, location of discharge (home vs. acute rehabilitation vs. long-term nursing facility), and date and cause of death.

## Depression Measures

ICD-9 diagnosis codes for all categories of depressive disorders were collected from the problem list in the electronic medical record. For the purposes of the study, if at any point prior to transplant a patient had any type of depression diagnosis present in their medical record, they were categorized as having a history of depression. Otherwise, the patient was categorized as having no history of depression.

## Statistical Analysis

R version 2.14.2 was used for all analyses. Univariable analyses were completed using Student's *t*-tests for normal continuous, Wilcoxon rank-sum and Kruskal-Wallis test for non-parametric continuous, and chi-square and Fisher's exact tests for categorical variables in order to evaluate how depression and the covariates associated with the outcomes of interest. Univariable regression models were made to evaluate the association between covariates and outcomes and then full regression models were created and then reduced using automated AIC optimization. Logistic and negative binomial regressions were used to assess factors associated with discharge disposition after transplant and transplant length of stay (LOS), respectively. Transplant survival was evaluated using Cox proportional-hazards models. All models were checked for multicollinearity using a pre-specified variance inflation factor of 5. Causes of death were evaluated by depression status and compared using Fisher's exact tests. Non-significant covariates that were omitted from the models are noted in the table footnotes. All confidence intervals (CI) are 95% CIs.

## Results

### Patient Population

The final cohort included 1115 recipients. [Table 1](#) shows the basic demographic characteristics of the total population and by pre-transplant depression status. The recipients were predominantly male and Caucasian with an average age of 56 and MELD score of 21. Immunosuppression was predominantly with tacrolimus (79%), followed by cyclosporine (9%), with 12 recipients on sirolimus/everolimus and 11 on other regimens on discharge from the initial hospitalization. The median follow-up time was 4.6 years (IQR = 1.8,7.6). Prior to transplant 207 (19%) had a history of depression, and those with a history of depression were significantly younger, were more likely to be female and Caucasian, and had a younger mean donor age than those recipients who did not have a history of depression.

### Length of Stay

The median length of transplant hospitalization (LOS) was 14 days (IQR = 10,27). Pre-transplant depression was significantly associated with LOS in univariate and multivariate models. Pre-transplant depression was associated with LOS in univariable and multivariable models

**Table 1. Patient Characteristics for the Cohort and by Depression Status.**

|                                         | Total<br>(N = 1115) | No Pre-transplant Depression<br>(N = 866) | Pre-transplant Depression<br>(N = 207) | P     |
|-----------------------------------------|---------------------|-------------------------------------------|----------------------------------------|-------|
| <b>Demographics &amp; Comorbidities</b> |                     |                                           |                                        |       |
| Age at transplant (mean)                | 56±11               | 57±10                                     | 54±10                                  | <0.01 |
| Female sex (n)                          | 404 (36%)           | 286 (33%)                                 | 98 (47%)                               | <0.01 |
| Race (n)                                |                     |                                           |                                        | 0.04  |
| White                                   | 1037 (93%)          | 797 (92%)                                 | 201 (97%)                              |       |
| Black                                   | 46 (4%)             | 41 (5%)                                   | 5 (2%)                                 |       |
| Other                                   | 26 (2%)             | 24 (3%)                                   | 1 (<1%)                                |       |
| Comorbidity score (mean)                | 5.3±1.4             | 5.3±1.4                                   | 5.3±1.4                                | 0.94  |
| <b>Liver Disease Factors</b>            |                     |                                           |                                        |       |
| MELD (mean)                             | 21±9                | 21±9                                      | 22±10                                  | 0.35  |
| Hepatocellular carcinoma (n)            | 215 (19%)           | 179 (21%)                                 | 33 (16%)                               | 0.15  |
| Etiology of liver disease (n)           |                     |                                           |                                        | 0.24  |
| Hepatitis C                             | 391 (35%)           | 310 (36%)                                 | 72 (35%)                               |       |
| Alcohol                                 | 212 (19%)           | 162 (19%)                                 | 46 (22%)                               |       |
| NASH                                    | 160 (14%)           | 116 (13%)                                 | 34 (16%)                               |       |
| AIH/PBC/PSC                             | 177 (16%)           | 149 (17%)                                 | 24 (12%)                               |       |
| Other                                   | 171 (15%)           | 128 (15%)                                 | 31 (15%)                               |       |
| <b>Transplant Factors</b>               |                     |                                           |                                        |       |
| Donor age (mean)                        | 47±18               | 47±18                                     | 44±18                                  | 0.05  |
| DCD donor (n)                           | 114 (10%)           | 88 (10%)                                  | 22 (11%)                               | 0.94  |
| Living donor (n)                        | 187 (17%)           | 148 (17%)                                 | 33 (16%)                               | 0.77  |
| WIT (median min)                        | 30 (25,36)          | 30 (25,34)                                | 30(25,32)                              | 0.55  |
| CIT (median hours)                      | 8.6(6.2,11.4)       | 8.5(6.2,11.4)                             | 8.6(5.9,11.2)                          | 0.87  |

Numbers may not sum to 100% due to missing data. Pre-transplant depression data could not be found for 42 patients (4% of the cohort). %s are column % s. Abbreviations: NASH = non-alcoholic steatohepatitis, AIH = autoimmune hepatitis, PBC = primary biliary cirrhosis, PSC = primary sclerosing cholangitis DCD = donation after cardiac death, wit = warm ischemia time, cit = cold ischemia time, fk = tacrolimus, is = immunosuppression

doi:10.1371/journal.pone.0165517.t001

(median = 19 vs. 14 days, IRR = 1.25, CI = 1.13,1.39). Other factors associated with LOS in univariable and multivariable models included MELD score at transplant (IRR/point = 1.02, CI = 1.02,1.03). HCC was associated with decreased length of stay (median 12 vs. 15 days, IRR = 0.77 CI = 0.69,0.86). A longer LOS was associated with non-tacrolimus-based immunosuppression (median 33 vs. 13 days, IRR = 1.98, CI = 1.79,2.28). Female gender and Charlson Comorbidity Index were significantly associated with LOS in univariate but not multivariate modeling.

### Post-Transplant Discharge Disposition

In terms of initial disposition, 58 (5%) patients did not survive their initial admission and 70 (6%) survived but did not have their discharge disposition documented in the electronic medical record. Among the 987 recipients with a known discharge disposition who survived the initial hospitalization, 692 (70%) were discharged home, 234 (24%) required transfer to a long-term acute care, and 61 (6%) required skilled nursing facility (SNF). Mean pre-transplant comorbidity index was not associated with disposition after transplant to home vs. facility (5.4 ±1.4 vs. 5.3±1.4, p = 0.64). Pre-transplant depression was significantly associated with discharge to a location other than home (either acute care or long-term care facilities). Thirty-six

**Table 2. Disposition After Transplant: Primary Data and Logistic Regression Models\***

| Covariate                             | Primary Data      |                         |                            | Univariate Analysis |                  | Multivariate Analysis |                  |
|---------------------------------------|-------------------|-------------------------|----------------------------|---------------------|------------------|-----------------------|------------------|
|                                       | Home<br>(N = 692) | Acute Care<br>(N = 234) | Long-Term Care<br>(N = 61) | OR                  | 95% CI           | OR                    | 95% CI           |
| <b>Demographics and Comorbidities</b> |                   |                         |                            |                     |                  |                       |                  |
| Age                                   | 55±10             | 59±10                   | 57±8                       | <b>1.04</b>         | <b>1.03,1.06</b> | <b>1.06</b>           | <b>1.04,1.07</b> |
| Female sex                            | 223 (38%)         | 99 (42%)                | 26 (43%)                   | <b>1.57</b>         | <b>1.18,2.09</b> | <b>1.50</b>           | <b>1.09,2.06</b> |
| Depression                            | 119 (17%)         | 55 (23%)                | 19 (31%)                   | <b>1.66</b>         | <b>1.19,2.31</b> | <b>1.68</b>           | <b>1.16,2.45</b> |
| <b>Liver Disease Factors</b>          |                   |                         |                            |                     |                  |                       |                  |
| MELD                                  | 20±8              | 24±10                   | 28±9                       | <b>1.07</b>         | <b>1.05,1.08</b> | <b>1.07</b>           | <b>1.05,1.09</b> |
| <b>Etiology of liver disease</b>      |                   |                         |                            |                     |                  |                       |                  |
| Hepatitis C                           | 261 (38%)         | 68 (29%)                | 28 (46%)                   | —                   | —                |                       |                  |
| Alcohol                               | 126 (18%)         | 50 (22%)                | 17 (28%)                   | 1.44                | 0.99,2.11        |                       |                  |
| NASH                                  | 95 (14%)          | 35 (15%)                | 6 (10%)                    | 1.16                | 0.74,1.78        |                       |                  |
| AIH/PBC/PSC                           | 115 (17%)         | 37 (16%)                | 7 (11%)                    | 1.02                | 0.67,1.56        |                       |                  |
| Other                                 | 95 (14%)          | 44 (19%)                | 2 (3%)                     | 1.30                | 0.84,1.99        |                       |                  |
| Hepatocellular carcinoma              | 160 (23%)         | 29 (12%)                | 13 (21%)                   | 0.56                | 0.38,0.81        | <b>0.43</b>           | <b>0.28,0.64</b> |
| <b>Transplant Factors</b>             |                   |                         |                            |                     |                  |                       |                  |
| Living donor                          | 136 (20%)         | 28 (12%)                | 3 (5%)                     | 0.48                | 0.31,0.72        |                       |                  |
| Non-tacrolimus immunosuppression      | 52 (8%)           | 52 (22%)                | 19 (31%)                   | 3.98                | 2.69,5.90        | <b>3.77</b>           | <b>2.46,5.80</b> |

\* The logistic regression model compared discharge to a location other than home vs. discharge home after transplantation

Nonsignificant variables that were not included in the table were race, comorbidity index, donation after cardiac death, donor age, ischemia times

Abbreviations: NASH = non-alcoholic steatohepatitis, AIH = autoimmune hepatitis, PBC = primary biliary cirrhosis, PSC = primary sclerosing cholangitis

doi:10.1371/journal.pone.0165517.t002

percent of patients with pre-transplant depression were discharged to a facility compared with 25% without pre-transplant. The statistically significant predictors of long-term care requirements (discharge to somewhere other than home) in a multivariate logistic regression model included age at transplant, female gender, depression pre-transplant, and higher MELD score at transplant (Table 2).

### Survival

Over the length of study follow-up 356 recipients died (32%). Fig 1 shows the Kaplan-Meier curves for survival of those recipients with vs. without pre-transplant depression. Depression was significantly associated with decreased survival time. In multivariable modeling (Table 3) depression was significantly associated with increased mortality. Factors significantly associated with improved survival time were younger age, other (non-White, non-Black) race, HCC, non-HCV etiology, tacrolimus-based immunosuppression, shorter warm ischemia time, lower MELD, and living donor transplant. The causes of death are shown in Table 4 both by depression vs. no depression. The only cause of death that was significantly increased among those with a history of pre-transplant depression was withdrawal of care.

### Discussion

Two themes emerge from this retrospective analysis of a large group of liver transplant recipients. First, these data support accumulating evidence that depression is associated with decreased survival after liver transplant. Secondly, these data add to the literature by investigating two more immediate post-transplant outcomes—discharge disposition and length of stay, both which were significantly associated with pre-transplant depression.

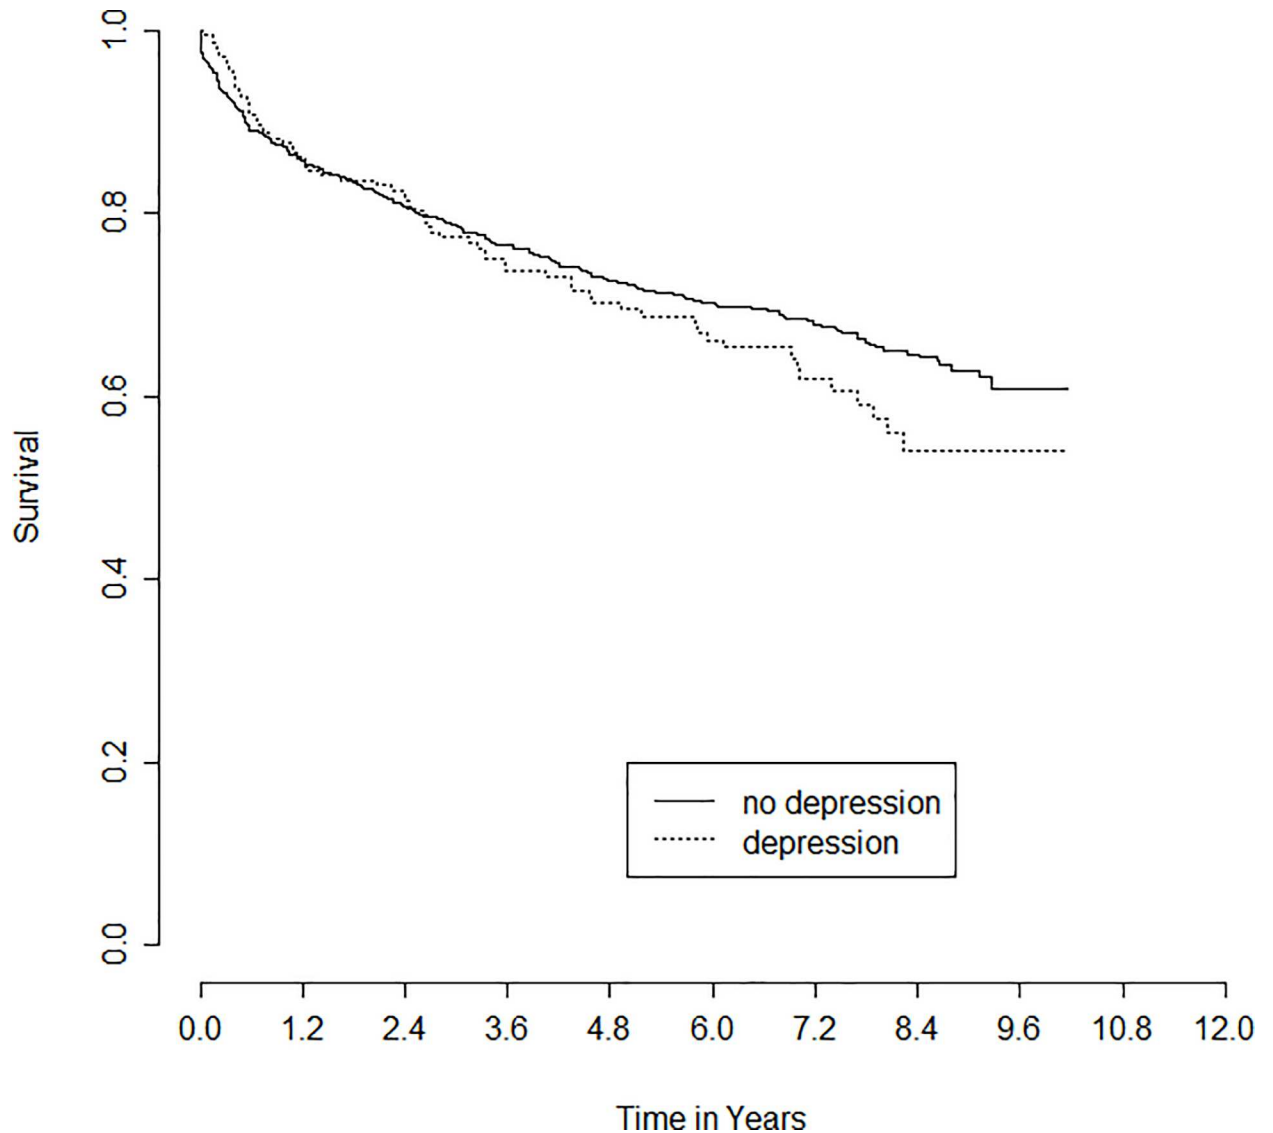

**Fig 1. Survival by Pre-Transplant Depression Status.**

doi:10.1371/journal.pone.0165517.g001

These data are consistent with the literature regarding depression in general populations. Depression has been consistently associated with increased cardiovascular and oncologic risk [13, 14], healthcare utilization [15, 16] and mortality [17, 18]. Several phenomena may contribute to the observed relationship between depression and poor health outcomes. Inflammation and activation of the hypothalamic-pituitary axis (HPA) related to depression can lead to a cascade of ill-effects [19]. Independent of this HPA activation, depression has been associated with medical non-adherence and poor health behaviors [14] which may further explain the connection between depression and poor health outcomes.

Our findings add to existing literature regarding depression in liver transplant recipients. In our previous work, we found that depressive symptoms in the first post-transplant year were associated with decreased long-term survival [10]. The present study, with a larger and more diverse sample, supports the association between depression and decreased long-term survival after transplantation. Additionally, the present study included a large cohort of patients with

**Table 3. Post-Transplant Survival: Primary Data and Cox Proportional-Hazards Models.**

| Covariate                             | Primary Data       |                        | Univariate Analysis |                   | Multivariate Analysis |                    |
|---------------------------------------|--------------------|------------------------|---------------------|-------------------|-----------------------|--------------------|
|                                       | Alive<br>(N = 759) | Not Alive<br>(N = 356) | HR                  | 95% CI            | HR                    | 95% CI             |
| <b>Demographics and Comorbidities</b> |                    |                        |                     |                   |                       |                    |
| Age (mean)                            | 54±11              | 59±11                  | <b>1.03</b>         | <b>1.02,1.05</b>  | <b>1.03</b>           | <b>1.01,1.04</b>   |
| Race (n)                              |                    |                        |                     |                   |                       |                    |
| White                                 | 702 (93%)          | 335 (95%)              | —                   | —                 |                       |                    |
| Black                                 | 32 (4%)            | 14 (4%)                | 1.02                | 0.56,1.87         |                       |                    |
| Other                                 | 23 (3%)            | 3 (<1%)                | 0.32                | 0.08,1.30         |                       |                    |
| Depression (n)                        | 138 (18%)          | 69 (19%)               | <b>1.49</b>         | <b>1.11,1.99</b>  | <b>1.54</b>           | <b>1.14,2.08</b>   |
| <b>Liver Disease Factors</b>          |                    |                        |                     |                   |                       |                    |
| MELD (mean)                           | 21±9               | 22±9                   | <b>1.03</b>         | <b>1.01,1.04</b>  | 1.01                  | 1.00,1.03          |
| Etiology (n)                          |                    |                        |                     |                   |                       |                    |
| Hepatitis C                           | 255 (34%)          | 136 (38%)              | —                   | —                 | —                     | —                  |
| Alcohol                               | 142 (19%)          | 70 (20%)               | 0.94                | 0.68,1.31         | 0.80                  | 0.57,1.11          |
| NASH                                  | 105 (14%)          | 55 (15%)               | 1.03                | 0.69,1.52         | 0.82                  | 0.54,1.23          |
| AIH/PBC/PSC                           | 132 (17%)          | 45 (13%)               | 0.76                | 0.51,1.11         | 0.73                  | 0.49,1.09          |
| Other                                 | 123 (16%)          | 48 (13%)               | 0.51                | 0.32,0.82         | <b>0.45</b>           | <b>0.28,0.73</b>   |
| Hepatocellular carcinoma (n)          | 154 (20%)          | 61 (17%)               | 1.09                | 0.79,1.50         |                       |                    |
| <b>Transplant Factors</b>             |                    |                        |                     |                   |                       |                    |
| Donor Age (mean)                      | 45±18              | 50±19                  | <b>1.01</b>         | <b>1.004,1.02</b> | <b>1.01</b>           | <b>1.0001,1.02</b> |
| DCD donor (n)                         | 70 (9%)            | 44 (12%)               | 1.24                | 0.86,1.81         |                       |                    |
| Living Donor (n)                      | 147 (19%)          | 40 (11%)               | <b>0.27</b>         | <b>0.16,0.48</b>  | <b>0.42</b>           | <b>0.23,0.76</b>   |
| Non-tacrolimus immunosuppression (n)  | 82 (11%)           | 46 (13%)               | <b>1.55</b>         | <b>1.10,2.18</b>  |                       |                    |
| Facility after transplant (n)         | 170 (22%)          | 125 (35%)              | <b>2.60</b>         | <b>1.68,2.86</b>  | <b>2.15</b>           | <b>1.65,2.81</b>   |

Not significant in univariate or multivariate models: gender, comorbidity index, warm and cold ischemia times bold = statistically significant in regression model. Abbreviations: NASH = non-alcoholic steatohepatitis, AIH = autoimmune hepatitis, PBC = primary biliary cirrhosis, PSC = primary sclerosing cholangitis

doi:10.1371/journal.pone.0165517.t003

**Table 4. Causes of Death by Depression Status (n = 1115).**

| Cause of Death             | Non-Depressed     | Total Depressed     |
|----------------------------|-------------------|---------------------|
|                            | (N = 908)         | (N = 207)           |
| Total Deaths               | 261 (29%)         | 69 (33%)            |
| Cardio-pulmonary           | 72 (8%, 28%)      | 17 (8%, 25%)        |
| Infection/Sepsis           | 48 (5%, 18%)      | 10 (5%, 14%)        |
| Hemorrhage                 | 10 (1%, 4%)       | 1 (<1%, 1%)         |
| Malignancy                 | 32 (4%, 12%)      | 9 (4%, 13%)         |
| Hepatic Failure            | 17 (2%, 7%)       | 5 (2%, 7%)          |
| Multi-system Organ Failure | 34 (4%, 13%)      | 5 (2%, 7%)          |
| Renal                      | 11 (1%, 4%)       | 2 (1%, 3%)          |
| Noncompliance              | 2 (<1%, 1%)       | 1 (<1%, 1%)         |
| Withdrawal of Care         | <b>5 (1%, 2%)</b> | <b>8 (4%, 12%)*</b> |
| Other                      | 7 (1%, 3%)        | 3 (1%, 4%)          |

Shown in columns are N(total column %, % of deaths in the column)

\*significantly different using fisher's exact test

doi:10.1371/journal.pone.0165517.t004

*pre-transplant* histories, allowing us to predict poor outcomes before the first post-transplant year, potentially allowing us to intervene early in the transplant process to target this high-risk group. Studies of post-transplant depression are inherently unable to assess early transplant outcomes. Thus, the present study adds to existing literature by not only assessing mortality but also intermediate outcomes of disposition and length of transplant stay, outcomes which cannot be evaluated in studies of post-transplant depression.

It is critical to recognize depression as a risk factor for adverse post-transplant outcomes because it is a highly treatable condition. While this data set was retrospective and did not allow for an exploration of treatment response and transplant outcomes, our prior data suggest that pre-transplant pharmacotherapy for depression is associated with decreased acute rejection [11]. Future work is necessary to understand the role of various modalities proven to be effective in managing depression, including both pharmacotherapy and psychotherapy, in improving transplant outcomes. The role of involving of caregivers in mental health care in the transplant setting has yet to be explored [20, 21]. Thus, this study suggests a potential role for early psychiatric intervention in improving both early and late transplant outcomes, which should be assessed in a future prospective analysis.

It is also notable that withdrawal of care was found to be a more common cause of death in patients with a history of any depression, regardless of treatment status at the time of transplant. Withdrawal of care could include stopping medications, stopping dialysis, or initiation of palliative care. While the numbers are small and the data retrospective, this finding gives some insight into the mechanism of death for patients with depression. The association between depression and withdrawal of care has been reported in other chronic medical conditions [22].

As with any retrospective, observational study, this study has certain limitations. While the retrospective dataset allowed us to examine a very large sample of all of our centers liver transplant patients over a ten year period, we did not have actual measures of psychiatric symptoms or response to antidepressant treatments. Accordingly, we did not know whether patients were treated by other therapeutic modalities such as psychotherapy. While ICD-9 codes are not the ideal way to capture active depressive symptoms, they have been used frequently in studies of depression in which it is not feasible to obtain symptom measures due to the retrospective nature of the study or the large population [23–26]. ICD-9 codes for depression have been found to have suboptimal sensitivity but high positive predictive values and specificity, suggesting that the control group may have some recipients with undetected depression. This would bias the results away from finding the effects that we found in the present study [27]. It was not possible to use psychosocial evaluations to assess for active depressive symptoms because of the non-uniform timing of the psychiatric evaluation in relation to the transplant date. Additionally, the evaluations were often not always available in the medical record. The retrospective nature of the study limited the granularity of the data regarding pre-transplant depression including full data about the timing of the diagnosis and measures of symptom activity. This close assessment of symptoms to transplantation has not been accomplished in other studies of depression pre-transplantation partly due to the unpredictable timing of organ availability in relationship to clinic visits. An additional limitation was our inability to measure and assess cognitive impairment due to the retrospective nature of the study. Delirium and cognitive impairment have been associated with hospital discharge to facilities in other contexts and would be valuable to collect in future prospective assessments of factors associated with discharge disposition [28]. While there were limitations of this dataset in terms of exposure, the transplant outcomes data were captured systematically and meticulously for regulatory reporting and for quality assurance purposes. Another potential limitation of this cohort is that it is comprised of predominantly White recipients at a single-center. Thus, these findings will



require validation in a multicenter population using prospective design with more detailed assessment of psychiatric symptoms and symptom severity in a more heterogeneous population. Despite these limitations, these data, together with other studies, suggest that depression is a risk factor for adverse transplant outcomes and add to the literature by adding early post-transplant outcomes of discharge disposition and length of stay to traditional survival assessments.

This study demonstrates that a history of depression is an important marker for worse outcomes after liver transplantation. Future studies are needed to assess the impact of psychotherapeutic and other interventions on outcomes.

## Acknowledgments

This material is the result of work supported with resources and the use of facilities at the VA Pittsburgh Healthcare System. The views expressed in this article are those of the authors and do not necessarily reflect the position or policy of the Department of Veterans Affairs.

## Author Contributions

**Conceptualization:** SR GM VU MC KB AD.

**Data curation:** SR GM VU.

**Formal analysis:** SR AD.

**Investigation:** SR GM VU.

**Methodology:** SR GM VU MC CG KB AC AD.

**Project administration:** SR AD.

**Software:** SR.

**Supervision:** SR MC CB OS CH PF AH AD.

**Validation:** SR GM VU.

**Visualization:** SR GM VU MC CG SZ KB AC NJ AJ OS CH PF AH AD.

**Writing – original draft:** SR GM VU MC CG KB AC NJ AD AJ.

**Writing – review & editing:** SR GM VU MC CG SZ KB AC NJ AJ OS CH PF AH AD.

## References

1. Jain A, Reyes J, Kashyap R, Dodson SF, Demetris AJ, Ruppert K, et al. Long-term survival after liver transplantation in 4,000 consecutive patients at a single center. *Annals of surgery*. 2000; 232(4):490–500. PMID: [10998647](#); PubMed Central PMCID: PMC1421181.
2. Ayerbe L, Ayis S, Crichton SL, Rudd AG, Wolfe CD. Explanatory factors for the increased mortality of stroke patients with depression. *Neurology*. 2014; 83(22):2007–12. doi: [10.1212/WNL.0000000000001029](#) PMID: [25355829](#); PubMed Central PMCID: PMC4248453.
3. Murad K, Goff DC Jr., Morgan TM, Burke GL, Bartz TM, Kizer JR, et al. Burden of Comorbidities and Functional and Cognitive Impairments in Elderly Patients at the Initial Diagnosis of Heart Failure and Their Impact on Total Mortality: The Cardiovascular Health Study. *JACC Heart failure*. 2015; 3(7):542–50. doi: [10.1016/j.jchf.2015.03.004](#) PMID: [26160370](#); PubMed Central PMCID: PMC4499113.
4. Banankhah SK, Friedmann E, Thomas S. Effective treatment of depression improves post-myocardial infarction survival. *World journal of cardiology*. 2015; 7(4):215–23. doi: [10.4330/wjc.v7.i4.215](#) PMID: [25914790](#); PubMed Central PMCID: PMC4404376.
5. Barboza KC, Salinas LM, Sahebjam F, Jesudian AB, Weisberg IL, Sigal SH. Impact of depressive symptoms and hepatic encephalopathy on health-related quality of life in cirrhotic hepatitis C patients.

- Metabolic brain disease. 2016; 31(4):869–80. Epub 2016/04/02. doi: [10.1007/s11011-016-9817-y](https://doi.org/10.1007/s11011-016-9817-y) PMID: [27032930](https://pubmed.ncbi.nlm.nih.gov/27032930/).
6. Rogal SS, Bielefeldt K, Wasan AD, Lotrich FE, Zickmund S, Szigethy E, et al. Inflammation, psychiatric symptoms, and opioid use are associated with pain and disability in patients with cirrhosis. *Clin Gastroenterol Hepatol*. 2015; 13(5):1009–16. doi: [10.1016/j.cgh.2014.10.029](https://doi.org/10.1016/j.cgh.2014.10.029) PMID: [25460019](https://pubmed.ncbi.nlm.nih.gov/25460019/); PubMed Central PMCID: [PMC4846465](https://pubmed.ncbi.nlm.nih.gov/PMC4846465/).
  7. Mullish BH, Kabir MS, Thursz MR, Dhar A. Review article: depression and the use of antidepressants in patients with chronic liver disease or liver transplantation. *Aliment Pharmacol Ther*. 2014; 40(8):880–92. doi: [10.1111/apt.12925](https://doi.org/10.1111/apt.12925) PMID: [25175904](https://pubmed.ncbi.nlm.nih.gov/25175904/).
  8. Nelligan JA, Loftis JM, Matthews AM, Zucker BL, Linke AM, Hauser P. Depression comorbidity and antidepressant use in veterans with chronic hepatitis C: results from a retrospective chart review. *J Clin Psychiatry*. 2008; 69(5):810–6. Epub 2008/04/23. [ej07m03109 \[pii\]](https://doi.org/10.1097/JCP.0b013e318169109). PMID: [18426262](https://pubmed.ncbi.nlm.nih.gov/18426262/).
  9. Miller LR, Paulson D, Eshelman A, Bugenski M, Brown KA, Moonka D, et al. Mental health affects the quality of life and recovery after liver transplantation. *Liver Transpl*. 2013; 19(11):1272–8. doi: [10.1002/lt.23728](https://doi.org/10.1002/lt.23728) PMID: [23959592](https://pubmed.ncbi.nlm.nih.gov/23959592/).
  10. Rogal SS, Dew MA, Fontes P, DiMartini AF. Early treatment of depressive symptoms and long-term survival after liver transplantation. *Am J Transplant*. 2013; 13(4):928–35. doi: [10.1111/ajt.12164](https://doi.org/10.1111/ajt.12164) PMID: [23425326](https://pubmed.ncbi.nlm.nih.gov/23425326/); PubMed Central PMCID: [PMC3618550](https://pubmed.ncbi.nlm.nih.gov/PMC3618550/).
  11. Rogal SS, Landsittel D, Surman O, Chung RT, Rutherford A. Pretransplant depression, antidepressant use, and outcomes of orthotopic liver transplantation. *Liver Transpl*. 2011; 17(3):251–60. Epub 2011/03/09. doi: [10.1002/lt.22231](https://doi.org/10.1002/lt.22231) PMID: [21384507](https://pubmed.ncbi.nlm.nih.gov/21384507/); PubMed Central PMCID: [PMC3078692](https://pubmed.ncbi.nlm.nih.gov/PMC3078692/).
  12. Charlson ME, Pompei P, Ales KL, MacKenzie CR. A new method of classifying prognostic comorbidity in longitudinal studies: development and validation. *Journal of chronic diseases*. 1987; 40(5):373–83. PMID: [3558716](https://pubmed.ncbi.nlm.nih.gov/3558716/).
  13. Nemeroff CB, Goldschmidt-Clermont PJ. Heartache and heartbreak—the link between depression and cardiovascular disease. *Nature reviews Cardiology*. 2012; 9(9):526–39. doi: [10.1038/nrcardio.2012.91](https://doi.org/10.1038/nrcardio.2012.91) PMID: [22733213](https://pubmed.ncbi.nlm.nih.gov/22733213/).
  14. Saint Onge JM, Krueger PM, Rogers RG. The relationship between major depression and nonsuicide mortality for u.s. Adults: the importance of health behaviors. *The journals of gerontology Series B, Psychological sciences and social sciences*. 2014; 69(4):622–32. doi: [10.1093/geronb/gbu009](https://doi.org/10.1093/geronb/gbu009) PMID: [24569003](https://pubmed.ncbi.nlm.nih.gov/24569003/); PubMed Central PMCID: [PMC4049146](https://pubmed.ncbi.nlm.nih.gov/PMC4049146/).
  15. Hendrie HC, Lindgren D, Hay DP, Lane KA, Gao S, Purnell C, et al. Comorbidity profile and healthcare utilization in elderly patients with serious mental illnesses. *Am J Geriatr Psychiatry*. 2013; 21(12):1267–76. doi: [10.1016/j.jagp.2013.01.056](https://doi.org/10.1016/j.jagp.2013.01.056) PMID: [24206938](https://pubmed.ncbi.nlm.nih.gov/24206938/); PubMed Central PMCID: [PMC3572246](https://pubmed.ncbi.nlm.nih.gov/PMC3572246/).
  16. Moraska AR, Chamberlain AM, Shah ND, Vickers KS, Rummans TA, Dunlay SM, et al. Depression, healthcare utilization, and death in heart failure: a community study. *Circulation Heart failure*. 2013; 6(3):387–94. doi: [10.1161/CIRCHEARTFAILURE.112.000118](https://doi.org/10.1161/CIRCHEARTFAILURE.112.000118) PMID: [23512984](https://pubmed.ncbi.nlm.nih.gov/23512984/); PubMed Central PMCID: [PMC3689209](https://pubmed.ncbi.nlm.nih.gov/PMC3689209/).
  17. van Dooren FE, Nefs G, Schram MT, Verhey FR, Denollet J, Pouwer F. Depression and risk of mortality in people with diabetes mellitus: a systematic review and meta-analysis. *PLoS One*. 2013; 8(3):e57058. doi: [10.1371/journal.pone.0057058](https://doi.org/10.1371/journal.pone.0057058) PMID: [23472075](https://pubmed.ncbi.nlm.nih.gov/23472075/); PubMed Central PMCID: [PMC3589463](https://pubmed.ncbi.nlm.nih.gov/PMC3589463/).
  18. Fan H, Yu W, Zhang Q, Cao H, Li J, Wang J, et al. Depression after heart failure and risk of cardiovascular and all-cause mortality: A meta-analysis. *Preventive medicine*. 2014; 63C:36–42. doi: [10.1016/j.ypmed.2014.03.007](https://doi.org/10.1016/j.ypmed.2014.03.007) PMID: [24632228](https://pubmed.ncbi.nlm.nih.gov/24632228/).
  19. Leonard BE. The immune system, depression and the action of antidepressants. *Progress in neuro-psychopharmacology & biological psychiatry*. 2001; 25(4):767–80. PMID: [11383977](https://pubmed.ncbi.nlm.nih.gov/11383977/).
  20. Weitz ES, Hollon SD, Twisk J, van Straten A, Huibers MJ, David D, et al. Baseline Depression Severity as Moderator of Depression Outcomes Between Cognitive Behavioral Therapy vs Pharmacotherapy: An Individual Patient Data Meta-analysis. *JAMA psychiatry*. 2015; 72(11):1102–9. Epub 2015/09/24. doi: [10.1001/jamapsychiatry.2015.1516](https://doi.org/10.1001/jamapsychiatry.2015.1516) PMID: [26397232](https://pubmed.ncbi.nlm.nih.gov/26397232/).
  21. Diamond G, Josephson A. Family-based treatment research: a 10-year update. *Journal of the American Academy of Child and Adolescent Psychiatry*. 2005; 44(9):872–87. Epub 2005/08/23. doi: [10.1097/01.chi.0000169010.96783.4e](https://doi.org/10.1097/01.chi.0000169010.96783.4e) PMID: [16113616](https://pubmed.ncbi.nlm.nih.gov/16113616/).
  22. Lacson E Jr., Li NC, Guerra-Dean S, Lazarus M, Hakim R, Finkelstein FO. Depressive symptoms associate with high mortality risk and dialysis withdrawal in incident hemodialysis patients. *Nephrology, dialysis, transplantation: official publication of the European Dialysis and Transplant Association—European Renal Association*. 2012; 27(7):2921–8. doi: [10.1093/ndt/gfr778](https://doi.org/10.1093/ndt/gfr778) PMID: [22273670](https://pubmed.ncbi.nlm.nih.gov/22273670/).

23. Bhattacharya R, Shen C, Wachholtz AB, Dwibedi N, Sambamoorthi U. Depression treatment decreases healthcare expenditures among working age patients with comorbid conditions and type 2 diabetes mellitus along with newly-diagnosed depression. *BMC psychiatry*. 2016; 16:247. Epub 2016/07/20. doi: [10.1186/s12888-016-0964-9](https://doi.org/10.1186/s12888-016-0964-9) PMID: [27431801](https://pubmed.ncbi.nlm.nih.gov/27431801/); PubMed Central PMCID: PMC4950075.
24. Albrecht JS, Huang TY, Park Y, Langenberg P, Harris I, Netzer G, et al. New episodes of depression among Medicare beneficiaries with chronic obstructive pulmonary disease. *Int J Geriatr Psychiatry*. 2016; 31(5):441–9. Epub 2015/08/19. doi: [10.1002/gps.4348](https://doi.org/10.1002/gps.4348) PMID: [26284687](https://pubmed.ncbi.nlm.nih.gov/26284687/); PubMed Central PMCID: PMC4758915.
25. Albrecht JS, Park Y, Hur P, Huang TY, Harris I, Netzer G, et al. Adherence to Maintenance Medications among Older Adults with Chronic Obstructive Pulmonary Disease: The Role of Depression. *Annals of the American Thoracic Society*. 2016. Epub 2016/06/23. doi: [10.1513/AnnalsATS.201602-136OC](https://doi.org/10.1513/AnnalsATS.201602-136OC) PMID: [27332765](https://pubmed.ncbi.nlm.nih.gov/27332765/).
26. Vin-Raviv N, Akinyemiju TF, Galea S, Bovbjerg DH. Depression and Anxiety Disorders among Hospitalized Women with Breast Cancer. *PLoS One*. 2015; 10(6):e0129169. Epub 2015/06/04. doi: [10.1371/journal.pone.0129169](https://doi.org/10.1371/journal.pone.0129169) PMID: [26035180](https://pubmed.ncbi.nlm.nih.gov/26035180/); PubMed Central PMCID: PMC4452789.
27. Fiest KM, Jette N, Quan H, St Germaine-Smith C, Metcalfe A, Patten SB, et al. Systematic review and assessment of validated case definitions for depression in administrative data. *BMC psychiatry*. 2014; 14:289. Epub 2014/10/18. doi: [10.1186/s12888-014-0289-5](https://doi.org/10.1186/s12888-014-0289-5) PMID: [25322690](https://pubmed.ncbi.nlm.nih.gov/25322690/); PubMed Central PMCID: PMC4201696.
28. Neufeld KJ, Leoutsakos JM, Sieber FE, Wanamaker BL, Gibson Chambers JJ, Rao V, et al. Outcomes of early delirium diagnosis after general anesthesia in the elderly. *Anesthesia and analgesia*. 2013; 117(2):471–8. Epub 2013/06/13. doi: [10.1213/ANE.0b013e3182973650](https://doi.org/10.1213/ANE.0b013e3182973650) PMID: [23757476](https://pubmed.ncbi.nlm.nih.gov/23757476/); PubMed Central PMCID: PMC4017627.
